# Supplementary material for: Expression profiling of Trypanosoma congolense genes during development in the tsetse fly vector Glossina morsitans morsitans
Source: Parasit Vectors. 2018 Jul 3;11:380. doi: 10.1186/s13071-018-2964-8 (PMC6029126; doi:10.1186/s13071-018-2964-8)
Supplement: Supplementary file 6 — Table S3. Gene ontology analysis of differentially expressed gene products between C-parasites and PB-parasites. (XLSX 31 kb) [file 13071_2018_2964_MOESM6_ESM.xlsx]

## Sheet: Sheet1
Higher in the Cardia
Category	GO-ID	Term	FDR	P-value	Test*	Ref**
Cell component	GO:0016021	Integral component of membrane	2.21e-07	3.05e-09	109	513
	GO:0005871	Kinesin complex	7.88e-07	1.19e-08	24	56
	GO:0005874	Microtubule	0.000138	3.29e-06	25	77
	GO:0098589	Membrane region	0.00287	9.66e-05	7	11
	GO:0020016	Ciliary pocket	0.00385	0.000137	10	22
	GO:0009898	Cytoplasmic side of plasma membrane	0.00624	0.000224	6	9
	GO:0036477	Somatodendritic compartment	0.0417	0.00194	3	3
Molecular function	GO:0004016	Adenylate cyclase activity	2.15e-13	7.66e-16	35	65
	GO:0000166	Nucleotide binding	1.3e-12	5.82e-15	208	1045
	GO:0005524	ATP binding	1.51e-09	1.25e-11	152	741
	GO:0004674	Protein serine/threonine kinase activity	8.82e-09	1e-10	45	134
	GO:0003777	Microtubule motor activity	3.83e-07	5.63e-09	30	79
	GO:0042578	Phosphoric ester hydrolase activity	1.72e-05	3.34e-07	32	102
	GO:0022892	Substrate-specific transporter activity	5.26e-05	1.14e-06	42	159
	GO:0005275	Amine transmembrane transporter activity	8.46e-05	1.91e-06	16	36
	GO:0008017	Microtubule binding	0.00022	5.54e-06	25	79
	GO:0004198	Calcium-dependent cysteine-type endopeptidase activity	0.000437	1.15e-05	11	21
	GO:0004722	Protein serine/threonine phosphatase activity	0.000865	2.47e-05	14	34
	GO:0004713	Protein tyrosine kinase activity	0.00103	3.01e-05	5	5
	GO:0015291	Secondary active transmembrane transporter activity	0.00261	8.57e-05	8	14
	GO:0015224	Biopterin transporter activity	0.00657	0.000242	4	4
	GO:0061630	Ubiquitin protein ligase activity	0.0257	0.00109	4	5
	GO:0015189	L-lysine transmembrane transporter activity	0.0417	0.00194	3	3
Biological processes	GO:0006468	Protein phosphorylation	8.76e-17	9.41e-20	79	223
	GO:0009190	Cyclic nucleotide biosynthetic process	4.74e-14	1.48e-16	31	50
	GO:0035556	Intracellular signal transduction	9.94e-10	7.76e-12	52	158
	GO:0007018	Microtubule-based movement	5.58e-06	9.58e-08	33	69
	GO:0006865	Amino acid transport	8.57e-05	1.95e-06	17	40
	GO:0006470	Protein dephosphorylation	0.000268	6.87e-06	24	75
	GO:0019933	cAMP-mediated signaling	0.00256	8.35e-05	6	8
	GO:0009372	Quorum sensing	0.00385	0.000137	10	22
	GO:0015877	Biopterin transport	0.00657	0.000242	4	4
	GO:0052106	Quorum sensing involved in interaction with host	0.0129	0.000511	9	21
	GO:0008283	Cell proliferation	0.04	0.00181	8	20
	GO:0015819	Lysine transport	0.0417	0.00194	3	3
	GO:0019889	Pteridine metabolic process	0.0417	0.00194	3	3
	GO:0044145	Modulation of development of symbiont involved in interaction with host	0.0466	0.00224	9	25
		Higher in the Proboscis
Category	GO-ID	Term	FDR	P-value	Test*	Ref**
Cellular component	GO:0000786	Nucleosome	0.00341	5.28e-06	8	18
	GO:0044444	Cytoplasmic part	0.0194	6.92e-05	123	1463
	GO:0043227	Membrane-bounded organelle	0.0491	0.000405	124	1534
Molecular function	GO:0046982	Protein heterodimerization activity	0.00168	3.75e-07	9	18
Biological processes	GO:0006457	Protein folding	0.00341	4.49e-06	22	122
Test* Differentially expressed genes enriched in the pathway
Ref** Entire Trypanosoma congolense genes in the genome in the pathway
